# Supplementary material for: Estimating the causes of 4 million neonatal deaths in the year 2000
Source: Oxford University Press journal article supplement (doi:10.1093/ije/dyl043), 2006-03-23
Supplement: dyl043_Supplementary_Data.zip [file dyl043_Supplementary_Data.zip]

Archive with 2 entries (2 files):
- dyl043_suppl_tables.doc
- dyl043_suppl_fig.pdf
