# Supplementary material for: Estimating the causes of 4 million neonatal deaths in the year 2000
Source: Oxford University Press journal article supplement (doi:10.1093/ije/dyl043), 2006-03-23
Supplement: dyl043_Supplementary_Data.zip [file dyl043_Supplementary_Data.zip › dyl043_suppl_fig.pdf]

# Information sources

## Causes of neonatal deaths

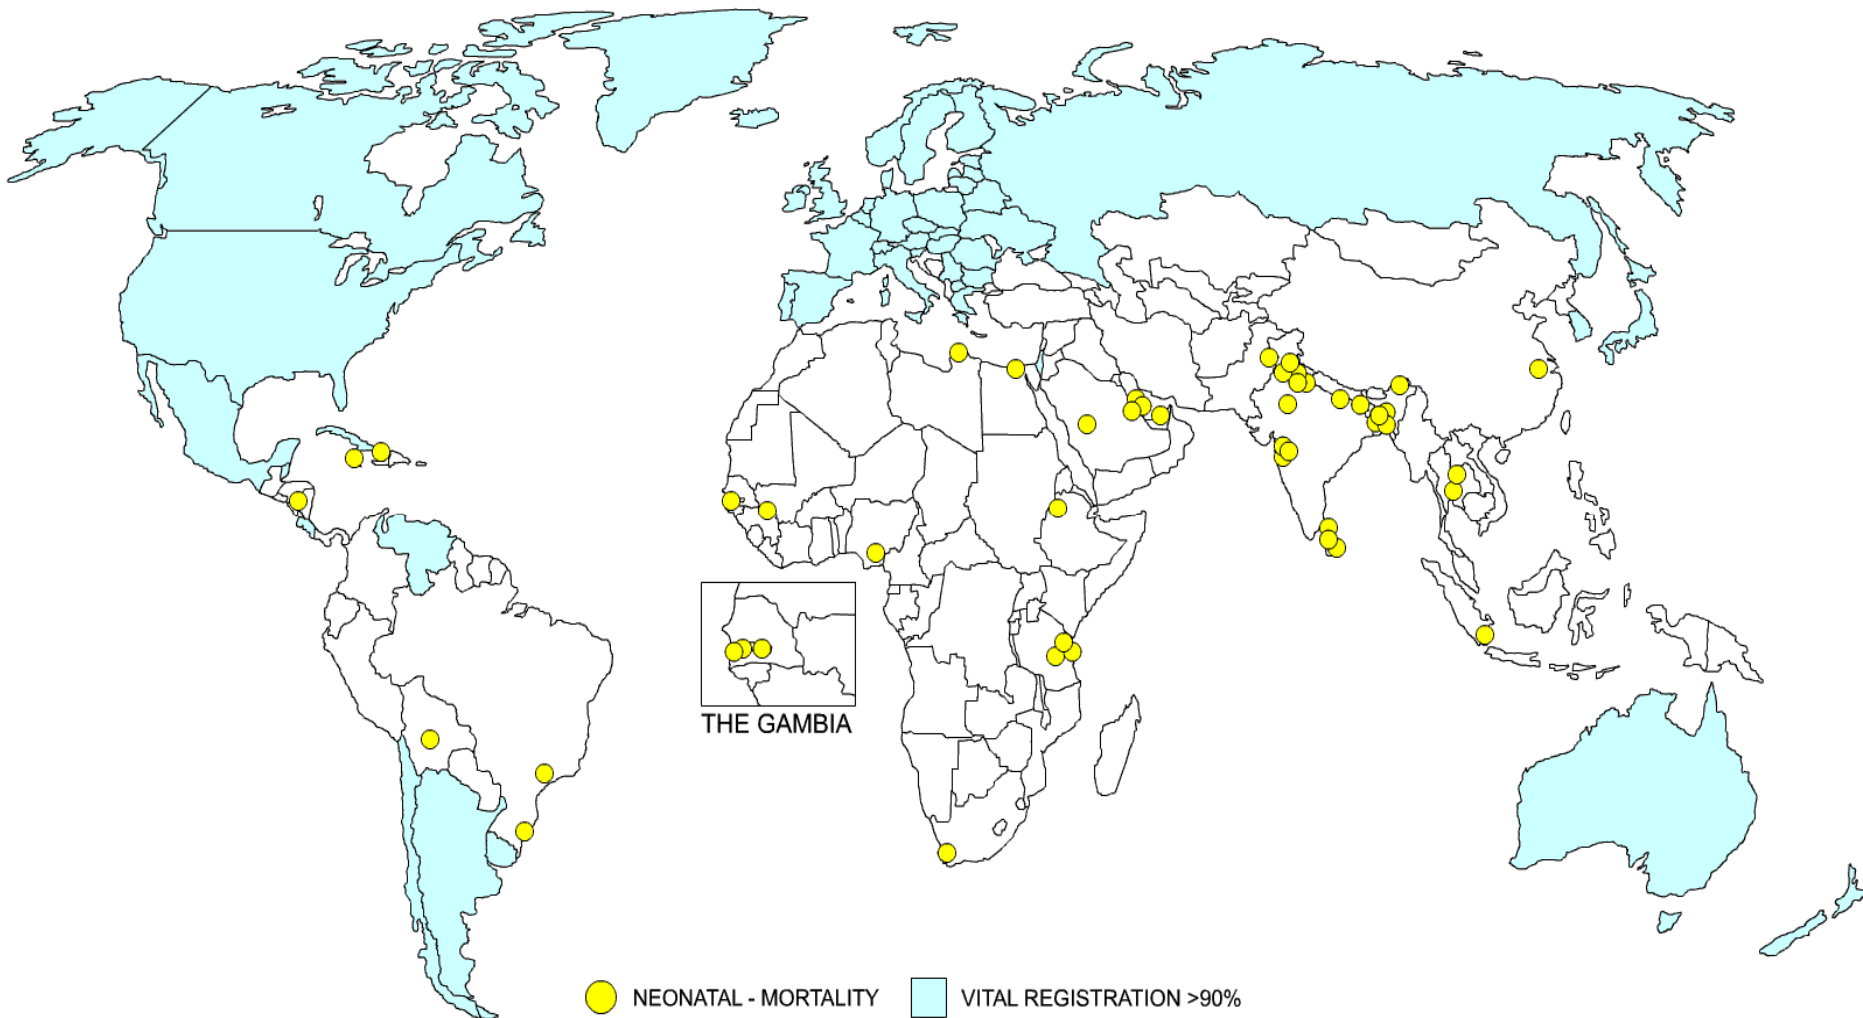

Vital Registration data for 45 countries (N = 96,797) and 56 studies identified through systematic searches of (N = 13,685, from 29 countries) Lawn JE, Cousens SN for the CHERG Neonatal Group
